# Supplementary material for: Recognition of small molecule–RNA binding sites using RNA sequence and structure
Source: PubMed Central journal article supplement — Bioinformatics. 2021 Jan 8;37(1):36–42. doi: 10.1093/bioinformatics/btaa1092 (PMC8034527; doi:10.1093/bioinformatics/btaa1092), 2021-01-08
Supplement: btaa1092_supplementary_data.pdf [file btaa1092_supplementary_data.pdf]

# Supplementary Materials

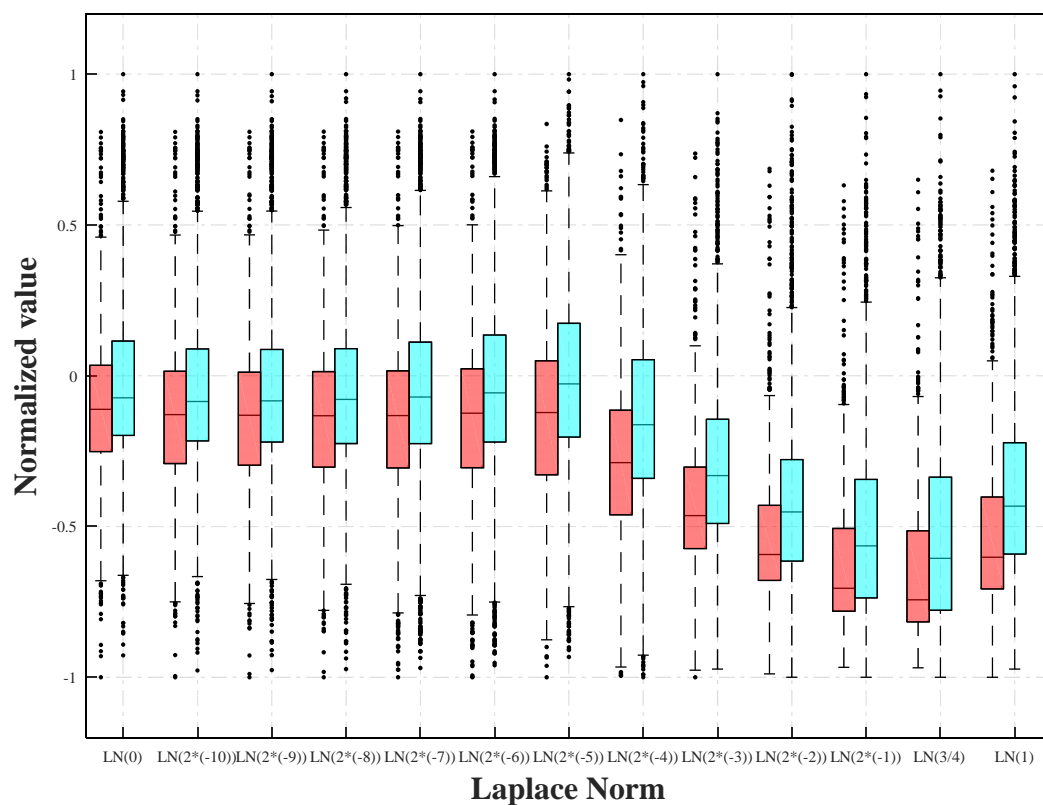

**Fig. S1.** Comparison of the distribution of Laplacian norms for ligand-binding (red) and non-ligand-binding (cyan) sites by systematical sampling of different scale factors based on the dataset RNA78.

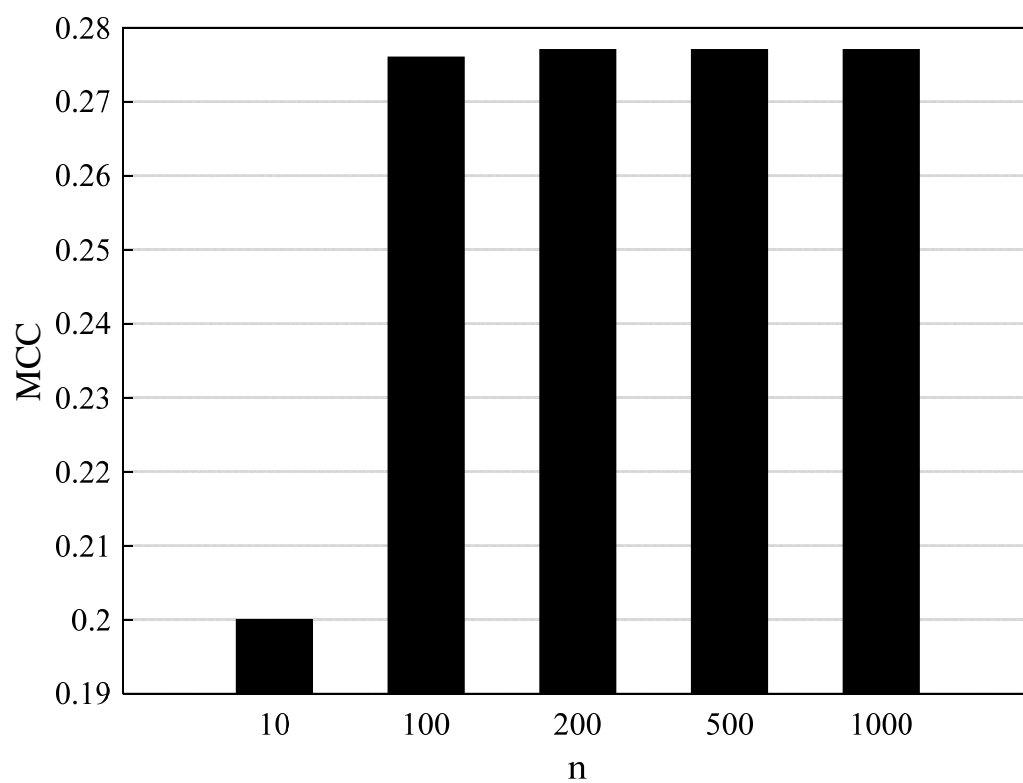

**Fig. S2.** Optimization of the value of trees  $n$  in RF based on the 5-fold-CV on the training set TR60.

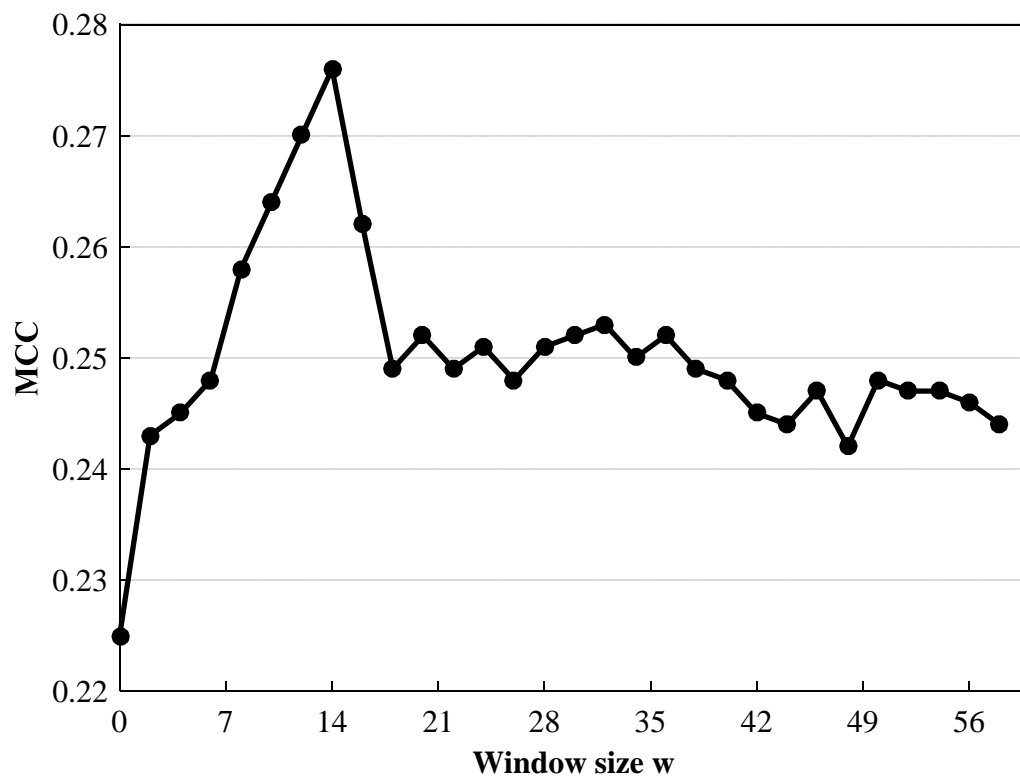

**Fig. S3.** Optimization of RNAsite\_str's window size based on 5-fold-CV on the training set TR60.

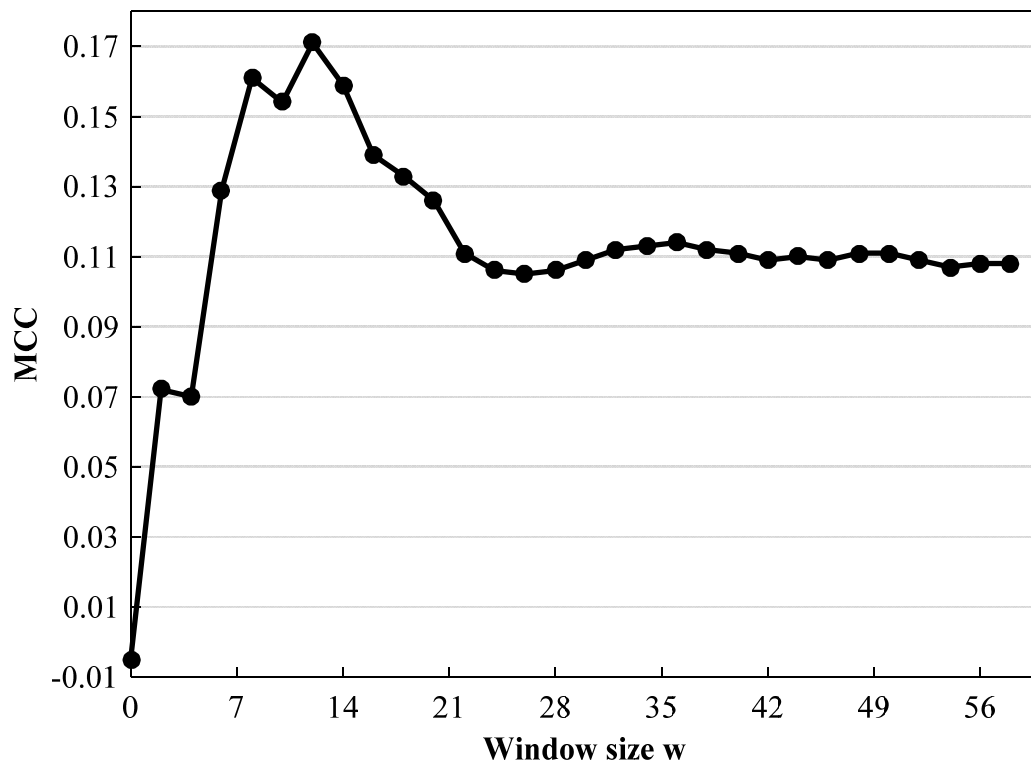

**Fig. S4.** Optimization of RNAsite\_seq's window size based on 5-fold-CV on the training set TR60.

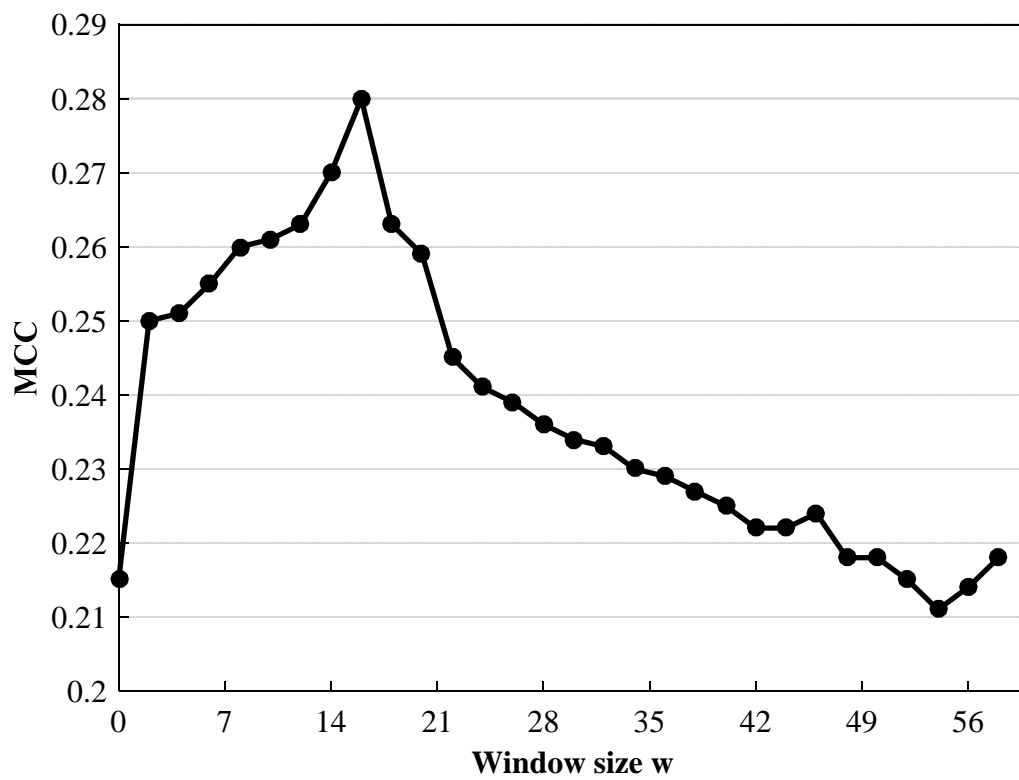

**Fig. S5.** Optimization of RNAsite's window size based on 5-fold-CV on the training set TR60.

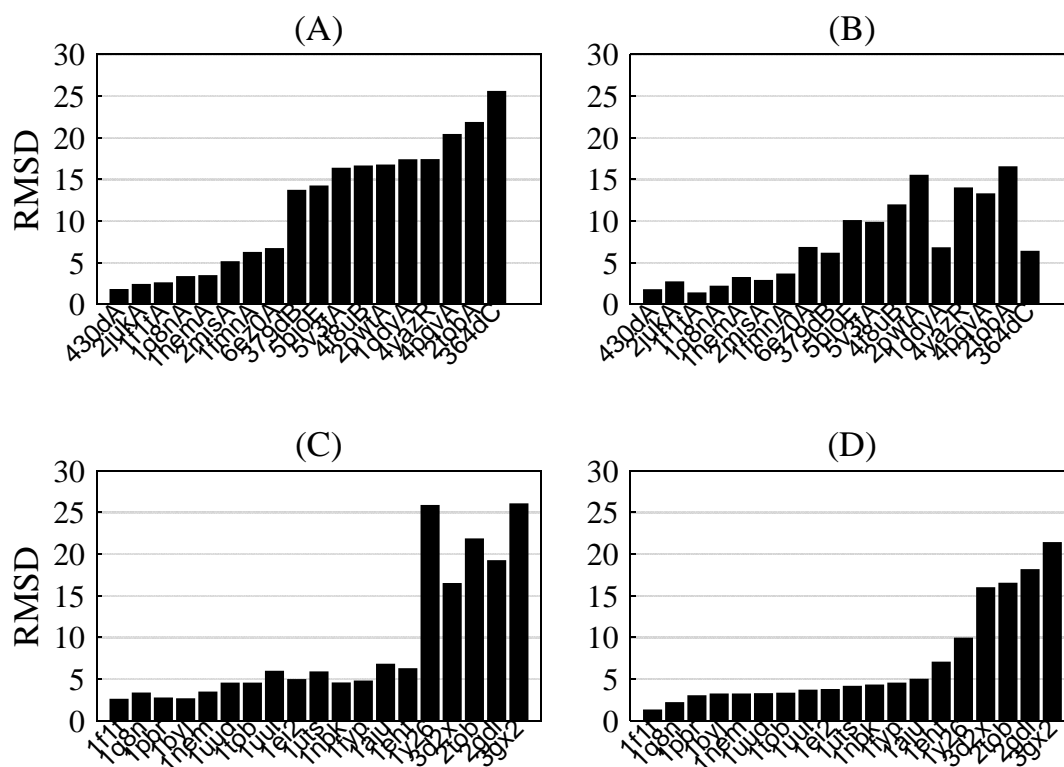

**Fig. S6.** Accuracy (RMSD) of the modeled structures compared to their native structures. (A) and (B) are respective global and local RMSD of TE18, while (C) and (D) are for RB19.

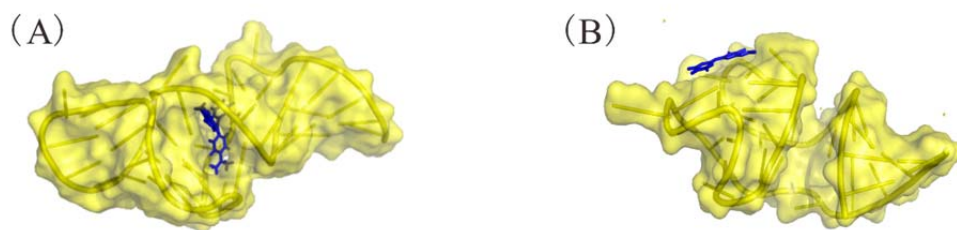

**Fig. S7.** Two examples to show the location of small molecule in RNA structure. The small molecule and RNA structure are shown in blue sticks and golden surface, respectively. (A) The small molecule is embedded in the concave region of the RNA structure (PDB ID: 1Q8N). (B) The small molecule is attached on the surface of the RNA structure (PDB ID: 5BJO).

**Table S1.** The details of each structure in TR60. The ‘Ligand’ column lists the ligand ID and the count of the corresponding ligand in the structure.

| <b>Targets</b> | <b>Ligands</b>      | <b>RNA structure title</b>                                                   |
|----------------|---------------------|------------------------------------------------------------------------------|
| 3sktA          | MG:2; GNG:1; MN:6;  | CRYSTAL STRUCTURE OF THE 2'- DEOXYGUANOSINE RIBOSWITCH                       |
| 5u3gB          | MG:21;              | STRUCTURE OF THE DICKEYA DADANTII YKKC RIBOSWITCH BOUND TO GUANIDINIUM       |
| 5j02A          | MG:49; 6F7:1;       | STRUCTURE OF THE LARIAT FORM OF A CHIMERIC DERIVATIVE                        |
| 2yieZ          | FMN:1; MG:6;        | CRYSTAL STRUCTURE OF A F. NUCLEATUM FMN RIBOSWITCH BOUND TO FMN              |
| 2fcyA          | NMY:2;              | HIV-1 DIS KISSING-LOOP IN COMPLEX WITH NEOMYCIN                              |
| 3gx3A          | SAH:1; MG:8;        | CRYSTAL STRUCTURE OF THE T. TENGCONGENSIS SAM-I RIBOSWITCH                   |
| 4nybA          | MN:4; 2QC:1; MG:9;  | CRYSTAL STRUCTURE OF THE E. COLI THIM PYROPHOSPHAE-SPECIFIC (TPP) RIBOSWITCH |
| 1hr2A          | MG:17;              | CRYSTAL STRUCTURE ANALYSIS OF A MUTANT P4-P6 DOMAIN                          |
| 4mgmB          | MG:9;               | CRYSTAL STRUCTURE OF THE IN VITRO TRANSCRIBED G. KAUSTOPHILUS TRNA-GLY       |
| 3oxeB          | MN:13; GLY:1; MG:5; | CRYSTAL STRUCTURE OF GLYCINE RIBOSWITCH                                      |
| 1y90B          | MN:7;               | HIV-1 DIS(MAL) DUPLEX MN-SOAKED                                              |
| 2quwB          | MG:10;              | HAMMERHEAD RIBOZYME G12A MUTANT AFTER CLEAVAGE                               |
| 4megB          | MG:15;              | IN VITRO EVOLVED GLMS RIBOZYME TRIPLE MUTANT                                 |
| 4lvxA          | H4B:2;              | STRUCTURE OF THE THF RIBOSWITCH BOUND TO TETRAHYDROBIOPTERIN                 |
| 4rgeB          | MG:8;               | CRYSTAL STRUCTURE OF THE IN-LINE ALIGNED ENV22 TWISTER RIBOZYME              |
| 4pcjA          | MG:3;               | MODIFICATIONS TO TOXIC CUG RNAS INDUCE STRUCTURAL STABILITY AND RESCUE       |
| 3c44A          | PAR:2;              | CRYSTAL STRUCTURE OF HIV-1 SUBTYPE F DIS EXTENDED DUPLEX                     |
| 5o69A          | AG2:1; MG:1;        | THE STRUCTURE OF THE THERMOBIFIDA FUSCA GUANIDINE III RIBOSWITCH             |
| 2lwkA          | 0EC:1;              | SOLUTION STRUCTURE OF SMALL MOLECULE-INFLUENZA RNA COMPLEX                   |
| 3vrsA          | MN:9;               | CRYSTAL STRUCTURE OF FLUORIDE RIBOSWITCH                                     |
| 2g5kA          | AM2:2;              | CRYSTAL STRUCTURE OF THE HOMO SAPIENS CYTOPLASMIC RIBOSOMAL                  |
| 5fj1C          | MG:3;               | THE STANDARD KINK TURN HMKT-7 AS STEM LOOP IN 2 P212121 SPACE GROUP          |
| 5d51D          | PRF:1; MG:3;        | PREQ1-II RIBOSWITCH WITH AN ENGINEERED G-U WOBBLE PAIR BOUND TO CS+          |
| 4frgX          | MG:8; I2A:1;        | CRYSTAL STRUCTURE OF THE COBALAMIN RIBOSWITCH APTAMER DOMAIN                 |



|       |                                |                                                                       |
|-------|--------------------------------|-----------------------------------------------------------------------|
| 1ylsB | MG:6; DAI:2;                   | CRYSTAL STRUCTURE OF SELENIUM-MODIFIED DIELS-ALDER RIBOZYME COMPLEXED |
| 3q50A | PRF:1;                         | STRUCTURAL ANALYSIS OF A CLASS I PREQ1 RIBOSWITCH APTAMER             |
| 4xw7A | AMZ:1; MG:10;                  | CRYSTAL STRUCTURE OF THE ZMP RIBOSWITCH AT 2.50 ANGSTROM              |
| 2ktzA | ISH:1;                         | INHIBITOR INDUCED STRUCTURAL CHANGE IN THE HCV IRES DOMAIN IIA RNA    |
| 4qlmA | MG:2; 2BA:2;                   | YDAO RIBOSWITCH BINDING TO C-DI-AMP                                   |
| 3fu2A | PRF:1; CA:4;                   | COCRYSTAL STRUCTURE OF A CLASS-I PREQ1 RIBOSWITCH                     |
| 5dh8B | ZN:4;                          | TWO DIVALENT METAL IONS AND CONFORMATIONAL CHANGES PLAY ROLES         |
| 3meiB | MG:3;                          | REGULATORY MOTIF FROM THE THYMIDYLATE SYNTHASE MRNA                   |
| 6fz0A | SAM:1; MG:1;                   | CRYSTAL STRUCTURE OF THE METY SAM V RIBOSWITCH                        |
| 2mxsA | PAR:1;                         | SOLUTION NMR-STRUCTURE OF THE NEOMYCIN SENSING RIBOSWITCH RNA         |
| 2nokC | MN:3; MG:2;                    | CRYSTAL STRUCTURE OF AN RNA DOMAIN FROM HEPATITIS C VIRUS.            |
| 1ajuA | ARG:1;                         | HIV-2 TAR-ARGININAMIDE COMPLEX                                        |
| 1fypA | PAR:1;                         | EUKARYOTIC DECODING REGION A-SITE RNA-PAROMOMYCIN COMPLEX             |
| 4k31C | AM2:4;                         | CRYSTAL STRUCTURE OF APRAMYCIN BOUND TO THE LEISHMANIAL RRNA A-SITE   |
| 2nokB | MG:4;                          | CRYSTAL STRUCTURE OF AN RNA DOMAIN FROM HEPATITIS C VIRUS.            |
| 1ntbA | MG:1; SRY:1;                   | 2.9 A CRYSTAL STRUCTURE OF STREPTOMYCIN RNA-APTAMER COMPLEX           |
| 3bnqC | PAR:1;                         | CRYSTAL STRUCTURE OF THE HOMO SAPIENS MITOCHONDRIAL                   |
| 5vciA | 8OS:1;                         | RNA HAIRPIN STRUCTURE CONTAINING TETRALOOP/RECEPTOR MOTIF             |
| 3q3zV | C2E:2; MG:6;                   | STRUCTURE OF A C-DI-GMP-II RIBOSWITCH FROM C. ACETOBUTYLICUM          |
| 1uudB | P14:1;                         | NMR STRUCTURE OF A SYNTHETIC SMALL MOLECULE                           |
| 1byjA | GE1:1; GE3:1; GE2:1;           | GENTAMICIN C1A A-SITE COMPLEX                                         |
| 1lvjA | PMZ:1;                         | STRUCTURE OF TAR RNA COMPLEXED WITH A TAT-TAR INTERACTION             |
| 1utsB | P13:1;                         | DESIGNED HIV-1 TAR BINDING LIGAND                                     |
| 1qd3A | BDG:1; RIB:1; CYY:1;<br>IDG:1; | HIV-1 TAR RNA/NEOMYCIN B COMPLEX                                      |
| 1arjN | ARG:1;                         | ARG-BOUND TAR RNA                                                     |
| 2l8hA | ARG:1; L8H:1;                  | CHEMICAL PROBE BOUND TO HIV TAR RNA                                   |
| 6hagA | SAH:1;                         | THE STRUCTURE OF THE SAM/SAH-BINDING RIBOSWITCH.                      |

|       |                      |                                                                        |
|-------|----------------------|------------------------------------------------------------------------|
| 1yrjA | AM2:2; MG:1;         | CRYSTAL STRUCTURE OF APRAMYCIN BOUND TO A RIBOSOMAL RNA A SITE         |
| 1tobA | TOC:1; TOA:1; TOB:1; | SACCHARIDE-RNA RECOGNITION IN AN AMINOGLYCOSIDE ANTIBIOTIC-            |
| 1f1tA | ROS:1;               | CRYSTAL STRUCTURE OF THE MALACHITE GREEN APTAMER COMPLEXED             |
| 3tztA | SS0:1; MG:5;         | STRUCTURE OF A RIBOSWITCH-LIKE RNA-LIGAND COMPLEX FROM THE HEPATITIS C |
| 4qjhC | MG:3;                | CRYSTAL STRUCTURE OF THE TWISTER RIBOZYME                              |
| 2kqpA | MIX:1;               | STRUCTURAL BASIS FOR STABILIZATION OF THE TAU PRE-MRNA SPLICING        |
| 1rawA | AMP:1;               | ATP BINDING RNA APTAMER IN COMPLEX WITH AMP                            |
| 1ehtA | TEP:1;               | THEOPHYLLINE-BINDING RNA IN COMPLEX WITH THEOPHYLLINE                  |
| 1nbkA | GND:2;               | THE STRUCTURE OF RNA APTAMER FOR HIV TAT COMPLEXED WITH TWO            |
| 1ei2A | NMY:1;               | STRUCTURAL BASIS FOR RECOGNITION OF THE RNA MAJOR GROOVE IN THE TAU    |

**Table S2.** The details of each structure in TE18. The ‘Ligand’ column lists the ligand ID and the count of the corresponding ligand in the structure.

| <b>Targets</b> | <b>Ligands</b>                 | <b>RNA structure title</b>                                            |
|----------------|--------------------------------|-----------------------------------------------------------------------|
| 2pwtA          | LHA:3;                         | CRYSTAL STRUCTURE OF THE BACTERIAL RIBOSOMAL DECODING SITE            |
| 5v3fA          | 74G:1;                         | CO-CRYSTAL STRUCTURE OF THE FLUOROGENIC RNA MANGO                     |
| 379dB          | CO:4;                          | THE STRUCTURAL BASIS OF HAMMERHEAD RIBOZYME SELF-CLEAVAGE             |
| 5bjoE          | MG:2; 747:1;                   | CRYSTAL STRUCTURE OF THE CORN RNA APTAMER IN COMPLEX WITH DFHO        |
| 4pqvA          | MG:7;                          | CRYSTAL STRUCTURE OF AN XRN1-RESISTANT RNA FROM THE 3' UNTRANSLATED   |
| 430dA          | MG:9;                          | STRUCTURE OF SARCIN/RICIN LOOP FROM RAT 28S RRNA                      |
| 1nemA          | BDR:1; BDG:1;<br>NEB:1; IDG:1; | SACCHARIDE-RNA RECOGNITION IN THE NEOMYCIN B / RNA APTAMER            |
| 1q8nA          | MGR:1;                         | SOLUTION STRUCTURE OF THE MALACHITE GREEN RNA BINDING                 |
| 1f1tA          | ROS:1;                         | CRYSTAL STRUCTURE OF THE MALACHITE GREEN APTAMER COMPLEXED            |
| 2jukA          | G0B:1;                         | GUANIDINO NEOMYCIN B RECOGNITION OF AN HIV-1 RNA HELIX                |
| 4yazR          | 4BW:1; MG:4;                   | 3'-CGAMP RIBOSWITCH BOUND WITH 3'                                     |
| 364dC          | MG:8;                          | 3.0 A STRUCTURE OF FRAGMENT I FROM E. COLI 5S RRNA                    |
| 6ez0A          | U37:5;                         | SPECIFIC PHOSPHOROTHIOATE SUBSTITUTION WITHIN DOMAIN 6 OF A GROUP II  |
| 2tobA          | TOA:1; 2TB:1; TOC:1;           | SOLUTION STRUCTURE OF THE TOBRAMYCIN-RNA APTAMER COMPLEX              |
| 1ddyA          | B12:1; NME:1;                  | MOLECULAR RECOGNITION BY THE VITAMIN B12 RNA APTAMER                  |
| 1fmnA          | FMN:1;                         | SOLUTION STRUCTURE OF FMN-RNA APTAMER COMPLEX                         |
| 2misA          | MG:4;                          | NMR LOCALIZATION OF DIVALENT CATIONS AT THE ACTIVE SITE               |
| 4f8uB          | SIS:2;                         | CRYSTAL STRUCTURE OF THE BACTERIAL RIBOSOMAL DECODING SITE IN COMPLEX |

**Table S3.** The details of each structure in RB19. The ‘Ligand’ column lists the ligand ID and the count of the corresponding ligand in the structure.

| <b>Target</b> | <b>Ligand</b>                                 | <b>RNA structure title</b>                                                 |
|---------------|-----------------------------------------------|----------------------------------------------------------------------------|
| 1aju          | ARG:1                                         | HIV-2 TAR-ARGININAMIDE COMPLEX                                             |
| 1byj          | GE1:1; GE3:1; GE2:1                           | GENTAMICIN C1A A-SITE COMPLEX                                              |
| 1eht          | TEP:1                                         | THEOPHYLLINE-BINDING RNA IN COMPLEX WITH THEOPHYLLINE                      |
| 1ei2          | NMY:1                                         | STRUCTURAL BASIS FOR RECOGNITION OF THE RNA MAJOR GROOVE IN THE TAU        |
| 1f1t          | ROS:1; SR(artifact):3                         | CRYSTAL STRUCTURE OF THE MALACHITE GREEN APTAMER COMPLEXED                 |
| 1fyp          | PAR:1                                         | EUKARYOTIC DECODING REGION A-SITE RNA-PAROMOMYCIN COMPLEX                  |
| 1nbk          | GND:2                                         | THE STRUCTURE OF RNA APTAMER FOR HIV TAT COMPLEXED                         |
| 1nem          | NEB:1; IDG:1; BDG:1; BDR:1                    | SACCHARIDE-RNA RECOGNITION IN THE NEOMYCIN B / RNA APTAMER                 |
| 1pbr          | IDG:1; PA1:1; BDR:1; CYY:1                    | STRUCTURE OF 16S RIBOSOMAL RNA                                             |
| 1q8n          | MGR:1                                         | SOLUTION STRUCTURE OF THE MALACHITE GREEN RNA BINDING                      |
| 1tob          | TOB:1; TOC:1; TOA:1                           | SACCHARIDE-RNA RECOGNITION IN AN AMINOGLYCOSIDE ANTIBIOTIC-                |
| 1uts          | P13:1                                         | DESIGNED HIV-1 TAR BINDING LIGAND                                          |
| 1uud          | P14:1                                         | NMR STRUCTURE OF A SYNTHETIC SMALL MOLECULE                                |
| 1uui          | P12:1                                         | NMR STRUCTURE OF A SYNTHETIC SMALL MOLECULE                                |
| 1y26          | MG:2; ADE:1                                   | A-RIBOSWITCH-ADENINE COMPLEX                                               |
| 2gdi          | NA(artifact):2; MG:3; TPP:1;<br>K(artifact):3 | CRYSTAL STRUCTURE OF THIAMINE PYROPHOSPHATE-SPECIFIC RIBOSWITCH IN COMPLEX |
| 2tob          | 2TB:1; TOC:1; TOA:1                           | SOLUTION STRUCTURE OF THE TOBRAMYCIN-RNA APTAMER COMPLEX                   |
| 3d2x          | MG:6; D2X:1                                   | STRUCTURE OF THE THIAMINE PYROPHOSPHATE-SPECIFIC RIBOSWITCH                |
| 3gx2          | MG:5; SFG:1                                   | TTESAM-I RIBOSWITCH VARIANT A94GU34C BOUND TO SINEFUNGIN                   |

**Table S4.** Comparison with existing methods on the TE18 dataset.

| Methods                  | MCC   | Precision | Recall | AUC   |
|--------------------------|-------|-----------|--------|-------|
| Rsite2                   | 0.01  | 0.37      | 0.214  | 0.474 |
| Rsite <sup>m</sup>       | 0.055 | 0.444     | 0.293  | 0.496 |
| Rsite                    | 0.071 | 0.449     | 0.288  | 0.509 |
| RBind <sup>m</sup>       | 0.141 | 0.560     | 0.139  | 0.540 |
| RBind                    | 0.187 | 0.655     | 0.173  | 0.559 |
| RNAsite_seq              | 0.16  | 0.481     | 0.294  | 0.641 |
| RNAsite_str <sup>m</sup> | 0.185 | 0.513     | 0.321  | 0.695 |
| RNAsite_str              | 0.25  | 0.67      | 0.265  | 0.769 |
| RNAsite <sup>m</sup>     | 0.186 | 0.515     | 0.317  | 0.703 |
| RNAsite                  | 0.253 | 0.675     | 0.263  | 0.776 |

Note: <sup>m</sup> denotes that the modeled structures were used.

**Table S5.** Comparison with existing methods on the RB19 dataset.

| Methods                  | MCC   | Precision | Recall | AUC   |
|--------------------------|-------|-----------|--------|-------|
| Rsite2                   | 0.099 | 0.39      | 0.279  | 0.529 |
| Rsite <sup>m</sup>       | 0.051 | 0.356     | 0.279  | 0.496 |
| Rsite                    | 0.103 | 0.394     | 0.33   | 0.513 |
| RBind <sup>m</sup>       | 0.187 | 0.554     | 0.180  | 0.558 |
| RBind                    | 0.315 | 0.796     | 0.239  | 0.597 |
| RNAsite_seq              | 0.508 | 0.684     | 0.606  | 0.801 |
| RNAsite_str <sup>m</sup> | 0.445 | 0.663     | 0.534  | 0.806 |
| RNAsite_str              | 0.557 | 0.750     | 0.633  | 0.874 |
| RNAsite <sup>m</sup>     | 0.526 | 0.677     | 0.620  | 0.834 |
| RNAsite                  | 0.567 | 0.754     | 0.647  | 0.877 |

Note: <sup>m</sup>denotes that the modeled structures were used.

**Table S6.** Comparison of predictive performance of static features and dynamic features of RNA structure on TE18.

| Methods    | MCC   | Pre   | Rec   | AUC   |
|------------|-------|-------|-------|-------|
| RNAsite    | 0.253 | 0.675 | 0.263 | 0.776 |
| D1_RNAsite | 0.249 | 0.653 | 0.276 | 0.763 |
| D5_RNAsite | 0.246 | 0.649 | 0.273 | 0.76  |

Note: D1\_RNAsite and D5\_RNAsite indicate adding two additional features (CL and DG) from one alternative structural configuration, and ten additional features from five alternative structural configurations extracted from the trajectory, respectively.







**Table S9.** The  $p$ -values of the statistical tests for the data in Table S4 based on MCC. The '+'/'-' sign in the lower triangle indicates that the MCC for the method from the row is higher/lower than the one from the corresponding column.

| Methods                  | Rsite <sup>m</sup> | Rsite2 | Rsite  | RBind <sup>m</sup> | RNAsite_seq | RNAsite <sup>m</sup> | RNAsite_str <sup>m</sup> | RBind     | RNAsite_str | RNAsite   |
|--------------------------|--------------------|--------|--------|--------------------|-------------|----------------------|--------------------------|-----------|-------------|-----------|
| Rsite <sup>m</sup>       |                    | 0.0001 | 0.0015 | 6*10-8             | 2.9*10-9    | 1.3*10-10            | 3.9*10-10                | 1.3*10-10 | 7.5*10-12   | 2.5*10-12 |
| Rsite2                   | +                  |        | 0.895  | 4.3*10-7           | 1.6*10-10   | 6.2*10-12            | 1.1*10-9                 | 3.1*10-8  | 1*10-10     | 8.3*10-12 |
| Rsite                    | +                  | +      |        | 1.2*10-6           | 4.1*10-11   | 1.8*10-10            | 4.9*10-9                 | 1.5*10-11 | 6.5*10-15   | 2.3*10-14 |
| RBind <sup>m</sup>       | +                  | +      | +      |                    | 3.8*10-9    | 4.9*10-9             | 2.7*10-7                 | 1.2*10-6  | 1*10-10     | 4.7*10-11 |
| RNAsite_seq              | +                  | +      | +      | +                  |             | 0.0005               | 0.0005                   | 2.4*10-6  | 0.0007      | 8.8*10-5  |
| RNAsite <sup>m</sup>     | +                  | +      | +      | +                  | +           |                      | 2.5*10-5                 | 1.9*10-6  | 0.1032      | 0.1546    |
| RNAsite_str <sup>m</sup> | +                  | +      | +      | +                  | -           | -                    |                          | 0.0004    | 1.3*10-5    | 2.1*10-6  |
| RBind                    | +                  | +      | +      | +                  | -           | -                    | -                        |           | 3.7*10-10   | 8*10-10   |
| RNAsite_str              | +                  | +      | +      | +                  | -           | +                    | +                        | +         |             | 0.1231    |
| RNAsite                  | +                  | +      | +      | +                  | -           | +                    | +                        | +         | +           |           |

**Table S10.** Comparison between our method and DCA. The comparison is based on 4 RNAs which DCA returned results. RNAsite is based on predicted RNA structure.  $L$  is the length of a target RNA. The top-ranked nucleotide pairs are regarded as binding small molecules.

| <b>Method</b>  | <b>MCC</b> | <b>Precision</b> | <b>Recall</b> | <b>AUC</b> |
|----------------|------------|------------------|---------------|------------|
| DCA ( $L/10$ ) | 0.011      | 0.229            | 0.132         | 0.499      |
| DCA ( $L/5$ )  | 0.071      | 0.248            | 0.299         | 0.516      |
| DCA ( $L/2$ )  | -0.066     | 0.198            | 0.396         | 0.351      |
| RNAsite_seq    | 0.086      | 0.405            | 0.091         | 0.6        |
| RNAsite        | 0.134      | 0.341            | 0.197         | 0.65       |

**Table S11.** Comparison between our method and InfoRNA. The comparison is based on 7 RNAs which the InfoRNA server returned results. RNAsite is based on predicted RNA structure.

| <b>Method</b> | <b>MCC</b> | <b>Precision</b> | <b>Recall</b> | <b>AUC</b> |
|---------------|------------|------------------|---------------|------------|
| InfoRNA       | -0.169     | 0.291            | 0.082         | 0.412      |
| RNAsite_seq   | 0.028      | 0.474            | 0.183         | 0.609      |
| RNAsite       | 0.144      | 0.555            | 0.232         | 0.663      |

**Table S12.** Comparison of predictive performance of RNAsite\_str based on native structures on three test subsets of TE18. The first (denoted by sub1) contains 4 RNAs with metal ions only. The second (denoted by sub2) contains containing 12 RNAs without any metal ions. The third (denoted by sub3) contains 2 RNAs with both metal ions and non-metal ion small-molecules.

| <b>Dataset (type, size of subset)</b> | <b>MCC</b> | <b>Precision</b> | <b>Recall</b> | <b>AUC</b> |
|---------------------------------------|------------|------------------|---------------|------------|
| sub1 (metal ions only, 4)             | 0.058      | 0.42             | 0.213         | 0.577      |
| sub2 (no metal ions, 12)              | 0.304      | 0.625            | 0.395         | 0.715      |
| sub3 (mixed, 2)                       | 0.193      | 0.422            | 0.296         | 0.649      |
